# Supplementary material for: Three-dimensional MXene/BCN microflowers for wearable all-solid-state microsupercapacitors
Source: Royal Society of Chemistry journal article supplement (doi:10.1039/d1tc02884g), 2021-01-01
Supplement: d1tc02884g1.pdf [file d1tc02884g1.pdf]

## **Three dimensional MXene/BCN Microflowers for Wearable All- solid-state microsupercapacitors**

Dan Tu <sup>a</sup>, Wen Yao Yang <sup>b</sup>, Yi Li <sup>b</sup>, Yujiu Zhou <sup>a</sup>, Liuwei Shi <sup>a</sup>, Jianhua Xu <sup>a,b\*</sup>, , Yajie Yang <sup>a\*</sup>

<sup>a</sup> State Key Laboratory of Electronic Thin Films and Integrated Devices, University of Electronic Science and Technology of China (UESTC), Chengdu, 610054, PR China

<sup>b</sup> Chongqing Engineering Research Center of New Energy Storage Devices and Applications, Chongqing, 402160, PR, China

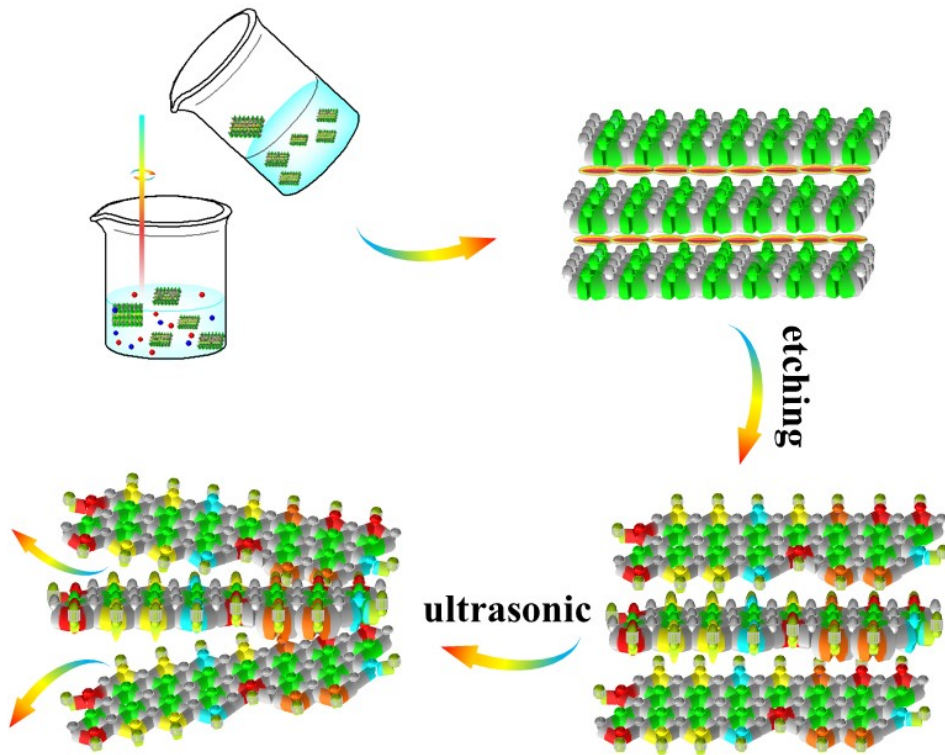

**Scheme S1** Schematic illustration of preparation for MXene (Ti<sub>3</sub>C<sub>2</sub>T<sub>x</sub>) nanosheets

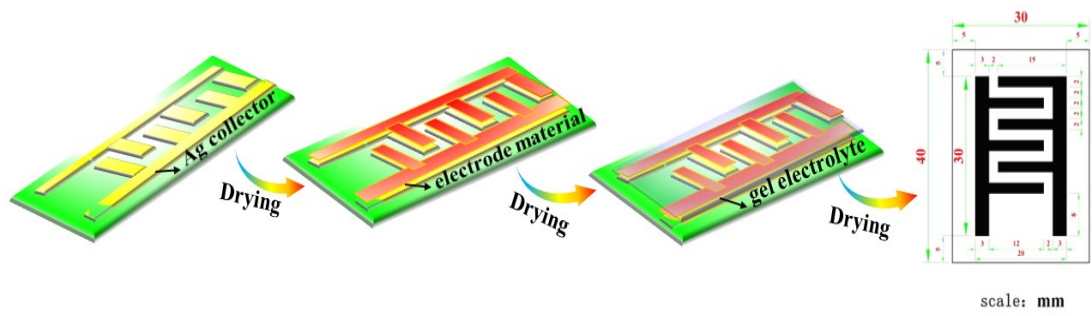

**Scheme S2** Scheme of the fabrication process of textile MSCs

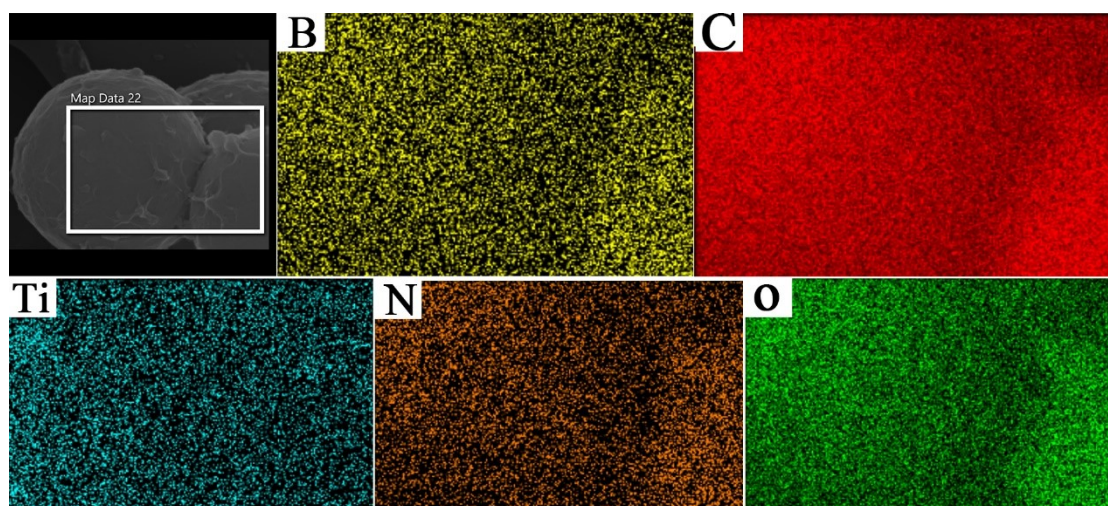

**Figure.S1.** EDS mapping images of the samples MXene/BCN-3 microflowers

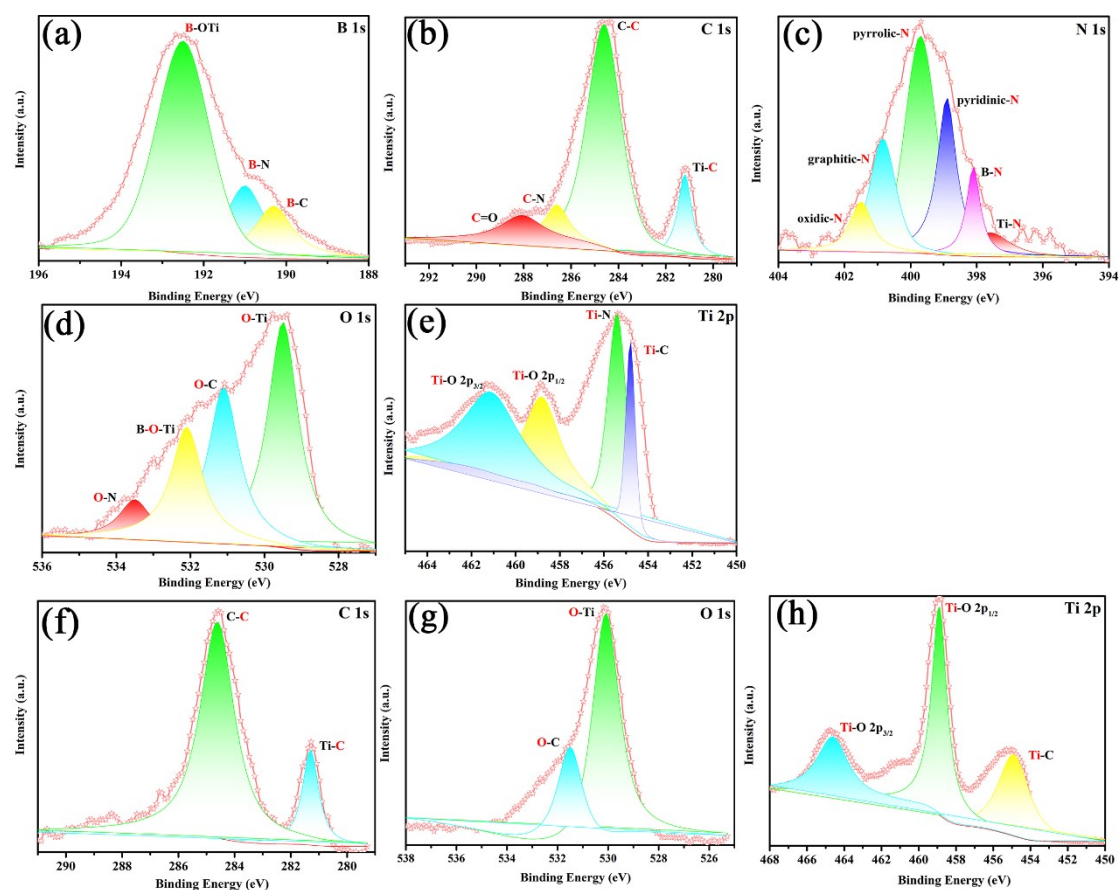

**Figure.S2.** (a) B 1s region of MXene/BCN-1, (b) C 1s region of MXene/BCN-1, (c) N 1s region of MXene/BCN-1, (d) O 1s region of MXene/BCN-1 and (e) Ti 2p region of MXene/BCN-1, (f) C 1s region of Mxene, (g) O 1s region of Mxene, (h) O 1s region of Mxene.

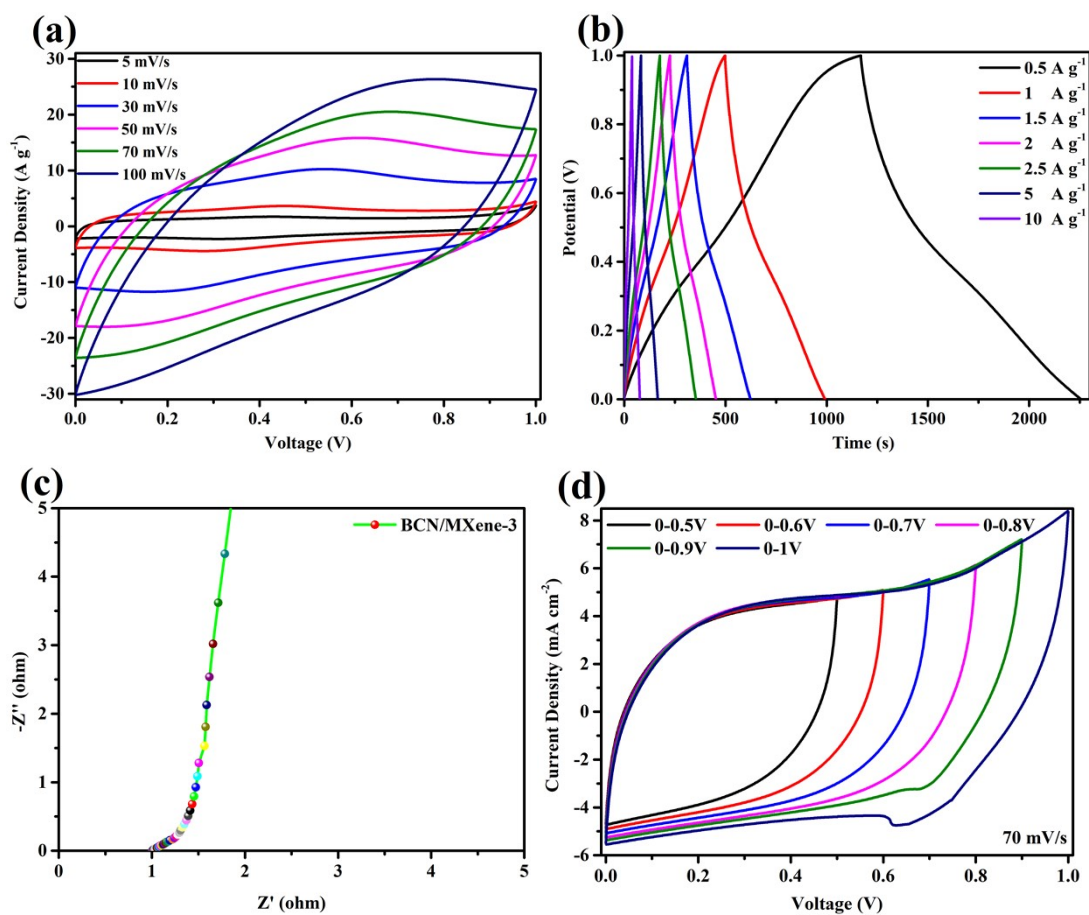

**Figure.S3.** the CV curves, GCD and Nyquist plots curves of MXene/BCN-3 microflower materials at different scan rates:(a) CV, (b) GCD, (c) Nyquist plots curves;(d) CV curves at different operating voltage ranges at the scanning rate of 70  $\text{mV/s}$ .

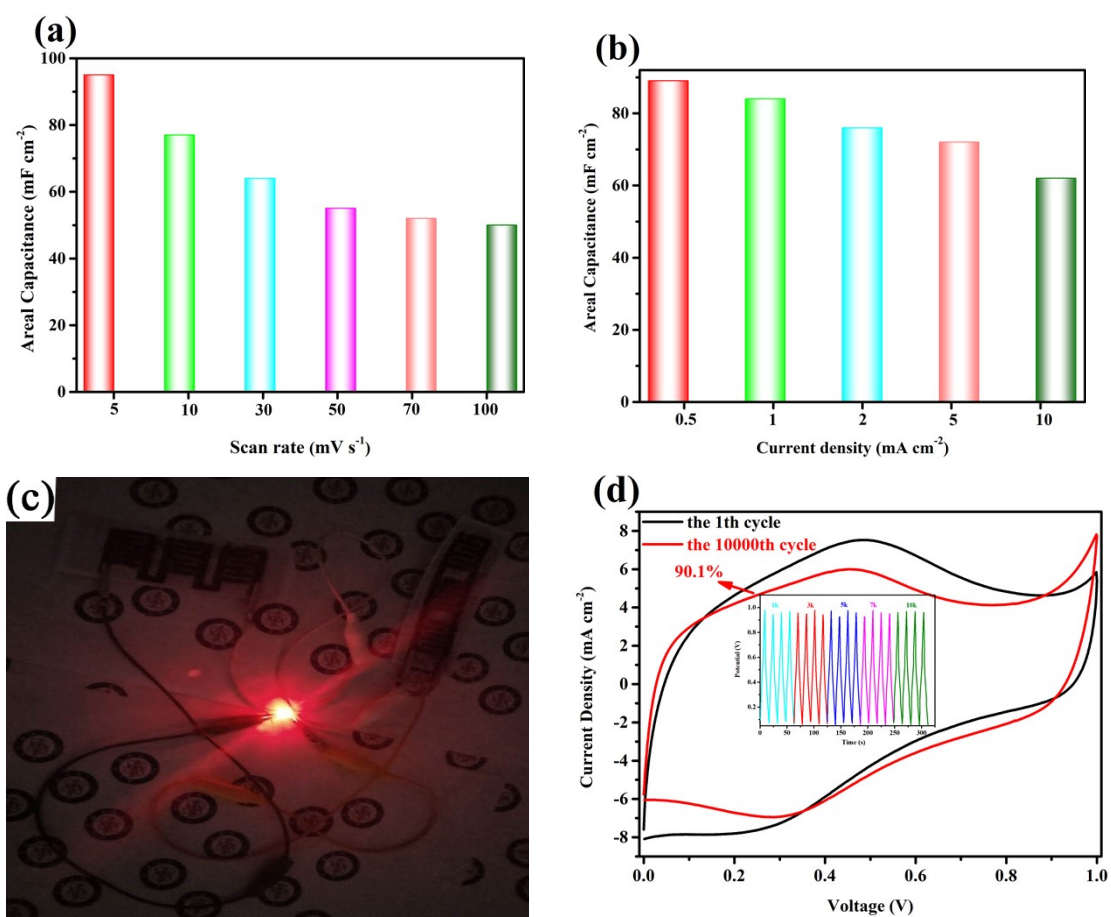

**Figure.S4.** (a) the CV curves of capacitance ability of the fabricated MSC under different scan rate: (b) GCD curves of capacitance ability of the MSC under different current density: (c) Light red LED (1.9V): (d) Cycling behavior of the MSC at scan rate of  $100 \text{ mV s}^{-1}$ .
